# Supplementary material
Source: ML conference proceedings conference paper supplement (https://www.ecva.net/papers/eccv_2020/papers_ECCV/html/123540171_ECCV_2020_paper.php)
Supplement: Supplementary file 1 [file 123540171-supp.zip]

Archive with 2 entries (2 files):
- supp_material/Joint_learning_of_Social_Groups_IndividualsAction_and_Sub-group_Activities_in_Videos.mp4
- supp_material/supp_material.pdf
